# Supplementary material for: Associations between physical activity, sedentary time and cardiovascular risk factors among Dutch children
Source: PubMed Central journal article supplement (PMC8396731; doi:10.1371/journal.pone.0256448), 2021-08-27
Supplement: pone.0256448.s001.pdf [file pone.0256448.s001.pdf]

## The Questionnaire of Baecke et al for Measurement of a Person's Habitual Physical Activity

Overview:

Baecke et al developed a questionnaire for evaluating a person's physical activity and separating it into three distinct dimensions. The authors were from the Netherlands.

Indices for physical activity:

(1) work activity

(2) sports activity

(3) leisure activity

### Work Index

| Question                      | Response          | Points |
|-------------------------------|-------------------|--------|
| What is your main occupation? | low activity      | 1      |
|                               | moderate activity | 3      |
|                               | high activity     | 5      |
| At work I sit                 | never             | 1      |
|                               | seldom            | 2      |
|                               | sometimes         | 3      |
|                               | often             | 4      |
|                               | always            | 5      |
| At work I stand               | never             | 1      |
|                               | seldom            | 2      |
|                               | sometimes         | 3      |
|                               | often             | 4      |
|                               | always            | 5      |
| At work I walk                | never             | 1      |
|                               | seldom            | 2      |
|                               | sometimes         | 3      |
|                               | often             | 4      |
|                               | always            | 5      |

|                                                                     |              |   |
|---------------------------------------------------------------------|--------------|---|
| At work I lift heavy loads                                          | never        | 1 |
|                                                                     | seldom       | 2 |
|                                                                     | sometimes    | 3 |
|                                                                     | often        | 4 |
|                                                                     | always       | 5 |
| After working I am tired                                            | very often   | 5 |
|                                                                     | often        | 4 |
|                                                                     | sometimes    | 3 |
|                                                                     | seldom       | 2 |
|                                                                     | never        | 1 |
| At work I sweat                                                     | very often   | 5 |
|                                                                     | often        | 4 |
|                                                                     | sometimes    | 3 |
|                                                                     | seldom       | 2 |
|                                                                     | never        | 1 |
| In comparison of others of my own age I think my work is physically | much heavier | 5 |
|                                                                     | heavier      | 4 |
|                                                                     | as heavy     | 3 |
|                                                                     | lighter      | 2 |
|                                                                     | much lighter | 1 |

where: • The work activity is according to the Netherlands Nutrition Council with (1) low activity including clerical work driving shopkeeping teaching studying housework medical practice and occupations requiring a university education; (2) middle activity including factory work plumbing carpentry and farming; (3) high activity includes dock work construction work and professional sport.

work index =  $((6 - (\text{points for sitting})) + \text{SUM}(\text{points for the other 7 parameters})) / 8$

### Sport Index

| Question                                                                                    | Response                       | Points      |
|---------------------------------------------------------------------------------------------|--------------------------------|-------------|
| Do you play sports?                                                                         | yes then calculate sport score | (see below) |
|                                                                                             | • sport score $\geq 12$        | 5           |
|                                                                                             | • sport score 8 to $< 12$      | 4           |
|                                                                                             | • sport score 4 to $< 8$       | 3           |
|                                                                                             | • sport score 0.01 to $< 4$    | 2           |
|                                                                                             | • sport score = 0              | 1           |
|                                                                                             | No                             | 1           |
| In comparison with others of my own age I think my physical activity during leisure time is | much more                      | 5           |
|                                                                                             | More                           | 4           |
|                                                                                             | the same                       | 3           |
|                                                                                             | Less                           | 2           |
|                                                                                             | much less                      | 1           |
| During leisure time I sweat                                                                 | very often                     | 5           |
|                                                                                             | Often                          | 4           |
|                                                                                             | sometimes                      | 3           |
|                                                                                             | Seldom                         | 2           |
|                                                                                             | Never                          | 1           |
| During leisure time I play sport                                                            | Never                          | 1           |
|                                                                                             | Seldom                         | 2           |
|                                                                                             | sometimes                      | 3           |
|                                                                                             | Often                          | 4           |
|                                                                                             | very often                     | 5           |

| <b>Data on Most Frequently Played Sport</b> | <b>Finding</b>   | <b>Value</b> |
|---------------------------------------------|------------------|--------------|
| What sport do yo play most frequently       | low intensity    | 0.76         |
|                                             | medium intensity | 1.26         |
|                                             | high intensity   | 1.76         |
| How many hours do you play a week?          | < 1 hour         | 0.5          |
|                                             | 1-2 hours        | 1.5          |
|                                             | 2-3 hours        | 2.5          |
|                                             | 3-4 hours        | 3.5          |
|                                             | > 4 hours        | 4.5          |
| How many months do you play in a year?      | < 1 month        | 0.04         |
|                                             | 1-3 months       | 0.17         |
|                                             | 4-6 months       | 0.42         |
|                                             | 7-9 months       | 0.67         |
|                                             | > 9 months       | 0.92         |

where: • The sport intensity is divided into 3 levels: (1) low level (billiards sailing bowling golf etc) with an average energy expenditure of 0.76 MK/h; (2) middle level (badminton cycling dancing swimming tennis) with an average energy expenditure of 1.26 MJ/h; (3) high level (boxing basketball football rugby rowing) with an average energy expenditure of 1.76 MJ/h

| <b>Data on Second Most Frequently Played Sport</b> | <b>Finding</b>   | <b>Value</b> |
|----------------------------------------------------|------------------|--------------|
| What sport do you play most frequently             | low intensity    | 0.76         |
|                                                    | medium intensity | 1.26         |
|                                                    | high intensity   | 1.76         |
| How many hours do you play a week?                 | < 1 hour         | 0.5          |
|                                                    | 1-2 hours        | 1.5          |
|                                                    | 2-3 hours        | 2.5          |
|                                                    | 3-4 hours        | 3.5          |
|                                                    | > 4 hours        | 4.5          |
| How many months do you play in a year?             | < 1 month        | 0.04         |
|                                                    | 1-3 months       | 0.17         |
|                                                    | 4-6 months       | 0.42         |
|                                                    | 7-9 months       | 0.67         |
|                                                    | > 9 months       | 0.92         |

simple sports score = ((value for intensity of most frequent sport) \* (value for weekly time of most frequent sport) \* (value for yearly proportion of most frequent sport)) \* ((value for intensity of second sport) \* (value for weekly time of second sport) \* (value for yearly proportion of second sport))

sport index = (SUM(points for all 4 parameters)) / 4

### Leisure Index

| Question                                                                                | Response      | Points |
|-----------------------------------------------------------------------------------------|---------------|--------|
| During leisure time I watch television                                                  | never         | 1      |
|                                                                                         | seldom        | 2      |
|                                                                                         | sometimes     | 3      |
|                                                                                         | often         | 4      |
|                                                                                         | very often    | 5      |
| During leisure time I walk                                                              | never         | 1      |
|                                                                                         | seldom        | 2      |
|                                                                                         | sometimes     | 3      |
|                                                                                         | often         | 4      |
|                                                                                         | very often    | 5      |
| During leisure time I cycle                                                             | never         | 1      |
|                                                                                         | seldom        | 2      |
|                                                                                         | sometimes     | 3      |
|                                                                                         | often         | 4      |
|                                                                                         | very often    | 5      |
| How many minutes do you walk and/or cycle per day to and from work school and shopping? | < 5 minutes   | 1      |
|                                                                                         | 5-15 minutes  | 2      |
|                                                                                         | 15-30 minutes | 3      |
|                                                                                         | 30-45 minutes | 4      |
|                                                                                         | > 45 minutes  | 5      |

leisure index = ((6 – (points for television watching)) + SUM(points for remaining 3 items)) / 4

#### References:

Baecke JAH Burema J Frijters ER. A short questionnaire for the measurement of habitual physical activity in epidemiological studies. *Am J Clin Nutr.* 1982; 36: 936-942.
